# Supplementary material
Source: Springer Nature journal article supplement (https://www.springermedizin.de/resource/supplementary/13046_2008_82_MOESM6_ESM.pdf/9661478)

Number of soft-agar colonies

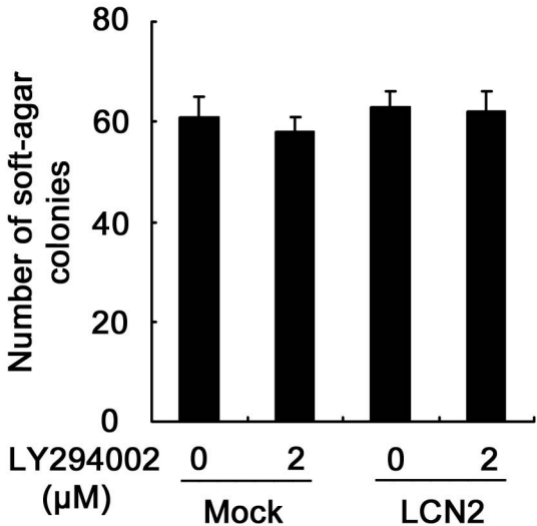

Supplement: MOESM6 [file 9661478]
